# Supplementary material for: Glycerol acetylation on mesoporous KIL-2 supported sulphated zirconia catalysts
Source: Royal Society of Chemistry journal article supplement (doi:10.1039/c4cy00548a), 2014-06-26
Supplement: c4cy00548a1.pdf [file c4cy00548a1.pdf]

## Glycerol acetylation on mesoporous KIL-2 supported sulphated zirconia catalysts

Margarita Popova,<sup>1\*</sup> Ágnes Szegedi,<sup>2</sup> Alenka Ristić,<sup>3</sup> Nataša Novak Tušar<sup>3,4</sup>

<sup>1</sup>Institute of Organic Chemistry with centre of Phytochemistry, Bulgarian Academy of Science, 1113 Sofia, Bulgaria

<sup>2</sup>Research Centre for Natural Sciences, Hungarian Academy of Sciences, Institute of Materials and Environmental Chemistry, 1117 Budapest, Magyar tudósok körútja 2, Hungary

<sup>3</sup>National Institute of Chemistry, Hajdrihova 19, 1001 Ljubljana, Slovenia

<sup>4</sup>University of Nova Gorica, Vipavska 13, 5001 Nova Gorica, Slovenia

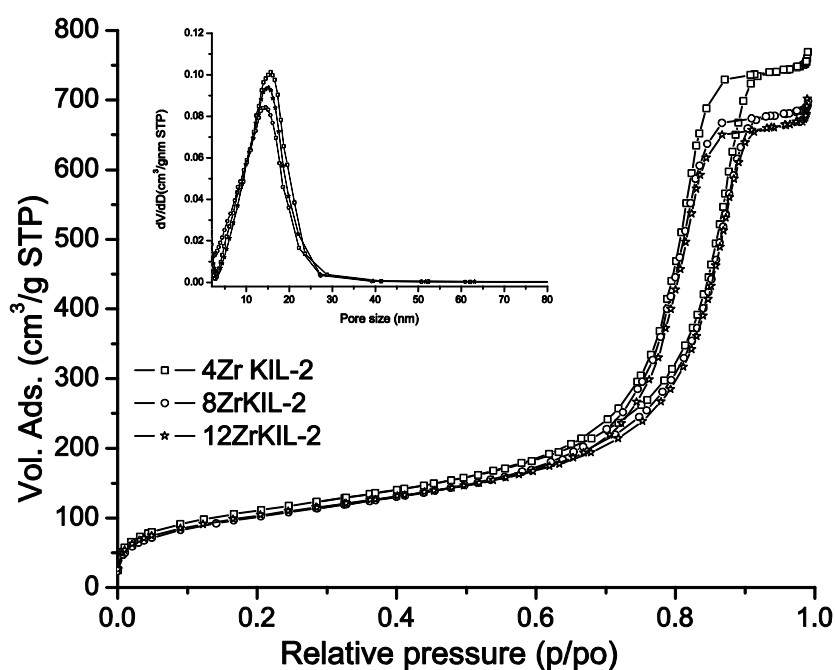

N<sub>2</sub> physisorption of the chosen spent catalysts.
